# Supplementary material
Source: publisher figshare collection journal article supplement (https://acs.figshare.com/ndownloader/files/3895264)
Supplement: Supplementary file 1 [file 3895264]

# Highly luminescent molten salts containing well shielded lanthanide centered complex anions and bulky imidazolium counteractions

Si-Fu Tang\*, Chantal Lorbeer, Xinjiao Wang, Pushpal Ghosh, and Anja-Verena

Mudring\*

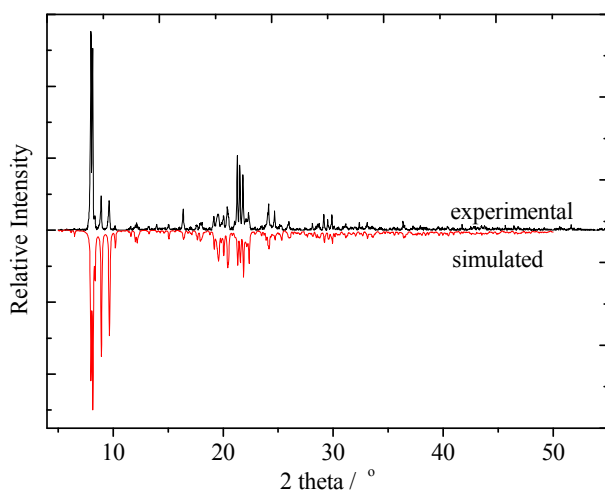

Figure S1. XRD diagram of compound 1.

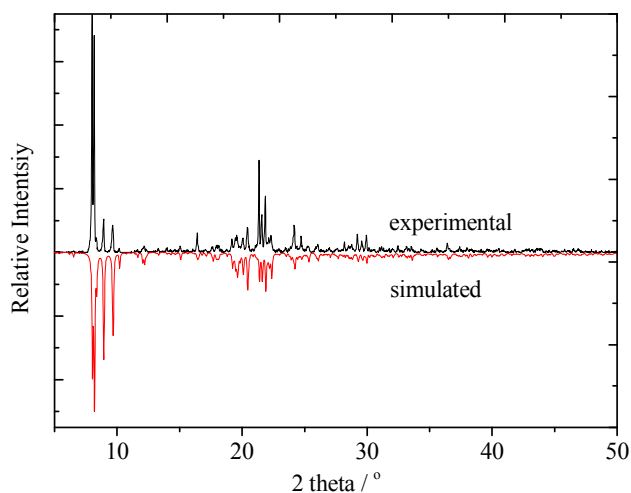

Figure S2. XRD diagram of compound 2.

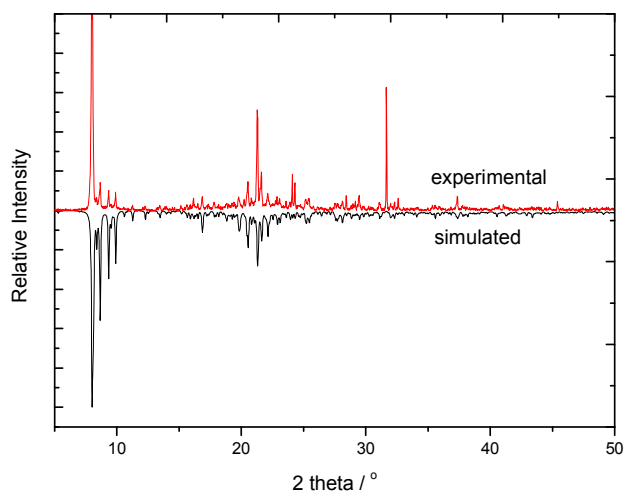

Figure S3. XRD diagram of compound **3**.

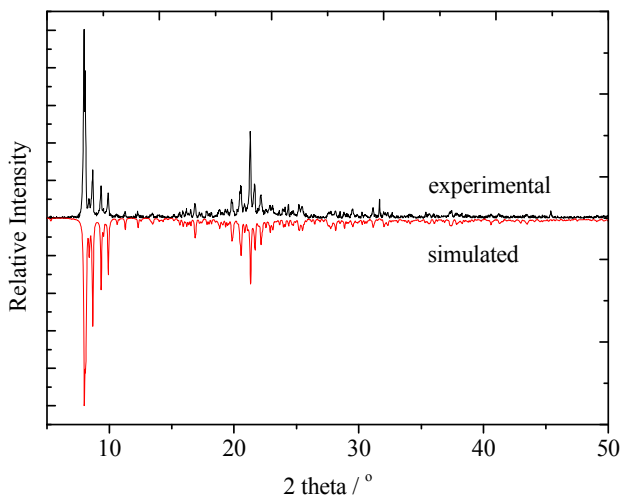

Figure S4. XRD diagram of compound **4**.

Table S1. Specified C-H $\cdots$ O hydrogen bonds (with esds except fixed and riding H)

| D-H      | H $\cdots$ A | D $\cdots$ A | $\angle$ (DHA) |                    |
|----------|--------------|--------------|----------------|--------------------|
| <b>1</b> |              |              |                |                    |
| 0.93     | 2.41         | 3.204(10)    | 143.1          | C50-H50A...O2_\$1  |
| 0.93     | 2.46         | 3.193(10)    | 135.6          | C50-H50A...O10_\$1 |
| 0.93     | 2.48         | 3.219(12)    | 136.2          | C51-H51A...O26     |
| 0.93     | 2.84         | 3.622(12)    | 143.0          | C52-H52A...O21     |
| 0.93     | 2.55         | 3.323(12)    | 140.9          | C52-H52A...O34     |
| 0.93     | 2.63         | 3.142(11)    | 115.3          | C56-H56A...O6      |
| 0.93     | 2.27         | 3.169(10)    | 161.7          | C56-H56A...O14     |
| 0.93     | 2.58         | 3.263(12)    | 130.9          | C57-H57A...O30_\$2 |
| 0.93     | 2.47         | 3.389(14)    | 170.8          | C57-H57A...O32_\$2 |

|          |      |           |       |                    |
|----------|------|-----------|-------|--------------------|
| 0.93     | 2.60 | 3.364(13) | 140.1 | C58-H58A...O22_\$2 |
| 0.93     | 2.78 | 3.546(12) | 140.2 | C58-H58A...O25_\$2 |
| 0.93     | 3.06 | 3.645(13) | 122.1 | C51-H51A...O29     |
| <b>2</b> |      |           |       |                    |
| 0.93     | 2.44 | 3.226(10) | 142.8 | C50-H50A...O2_\$1  |
| 0.93     | 2.45 | 3.200(10) | 137.4 | C50-H50A...O10_\$1 |
| 0.93     | 2.51 | 3.248(12) | 136.2 | C51-H51A...O26     |
| 0.93     | 2.84 | 3.621(11) | 142.8 | C52-H52A...O21     |
| 0.93     | 2.55 | 3.324(12) | 140.5 | C52-H52A...O34     |
| 0.93     | 2.61 | 3.149(11) | 117.4 | C56-H56A...O6      |
| 0.93     | 2.28 | 3.177(10) | 160.5 | C56-H56A...O14     |
| 0.93     | 2.55 | 3.254(12) | 132.8 | C57-H57A...O30_\$2 |
| 0.93     | 2.46 | 3.375(15) | 168.0 | C57-H57A...O32_\$2 |
| 0.93     | 2.57 | 3.358(14) | 142.1 | C58-H58A...O22_\$2 |
| 0.93     | 2.79 | 3.545(13) | 139.1 | C58-H58A...O25_\$2 |
| 0.93     | 3.04 | 3.644(13) | 124.0 | C51-H51A...O29     |
| <b>3</b> |      |           |       |                    |
| 0.93     | 2.49 | 3.13(3)   | 126.1 | C50-H50A...O2      |
| 0.93     | 2.30 | 3.15(3)   | 153.0 | C50-H50A...O10     |
| 0.93     | 2.54 | 3.32(4)   | 141.7 | C51-H51A...O18     |
| 0.93     | 2.46 | 3.17(4)   | 134.2 | C52-H52A...O30     |
| 0.93     | 2.47 | 3.29(4)   | 147.6 | C59-H59A...O22     |
| 0.93     | 2.85 | 3.55(3)   | 132.7 | C60-H60A...O26     |
| 0.93     | 2.52 | 3.25(3)   | 135.1 | C58-H58A...O6_\$1  |
| 0.93     | 2.40 | 3.24(3)   | 150.8 | C58-H58A...O14_\$1 |
| <b>4</b> |      |           |       |                    |
| 0.93     | 2.47 | 3.126(10) | 128.0 | C50-H50A...O2      |
| 0.93     | 2.32 | 3.163(10) | 151.0 | C50-H50A...O10     |
| 0.93     | 2.55 | 3.323(11) | 140.9 | C51-H51A...O18     |
| 0.93     | 2.49 | 3.200(12) | 133.1 | C52-H52A...O30     |
| 0.93     | 2.47 | 3.305(11) | 149.3 | C59-H59A...O22     |
| 0.93     | 2.87 | 3.568(11) | 132.5 | C60-H60A...O26     |
| 0.93     | 2.54 | 3.260(10) | 134.1 | C58-H58A...O6_\$1  |
| 0.93     | 2.37 | 3.229(10) | 153.0 | C58-H58A...O14_\$1 |

\$1 x, y+1, z; \$2 x+1, y, z

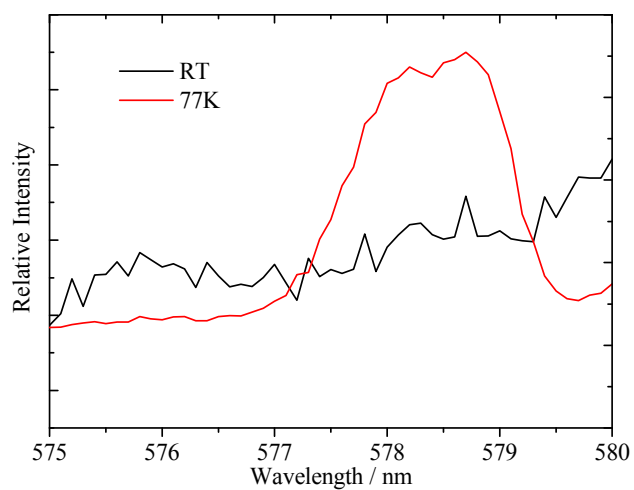

Figure S5.  $^5D_0$ - $^7F_0$  transition observed in compound **1**.

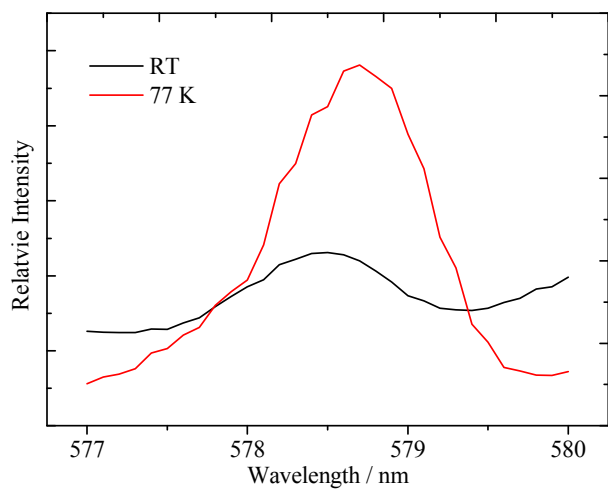

Figure S6.  $^5D_0$ - $^7F_0$  transition observed in compound **3**.
